# Supplementary material
Source: PubMed Central journal article supplement (PMC1314806)
Supplement: 2003-207-jiwa-s1.pdf [file 2003-207-jiwa-s1.pdf]

## Supplementary information

### Supplementary appendix 1. Feedback form.

#### Referrals to colorectal surgery; feedback for Dr .....

We were able to trace (number) referrals by you out of (number) in total over the six month period (date to date). We have data for (number) GPs.

Your referrals were made on the following dates and attracted the following marks:

| Date | Mark |
|------|------|
|------|------|

#### How did my scores compare to others in the locality?

Your referrals scored an average of: (number)/100 marks. The average score for the GPs referring colorectal cases to the District General Hospital was: (number)/100

Your scores ranked: (number) / (Number). The quality of your referrals relative to others in the locality (anonymised) is shown in the graph below:

*The quality of your referrals relative to others in the locality.*

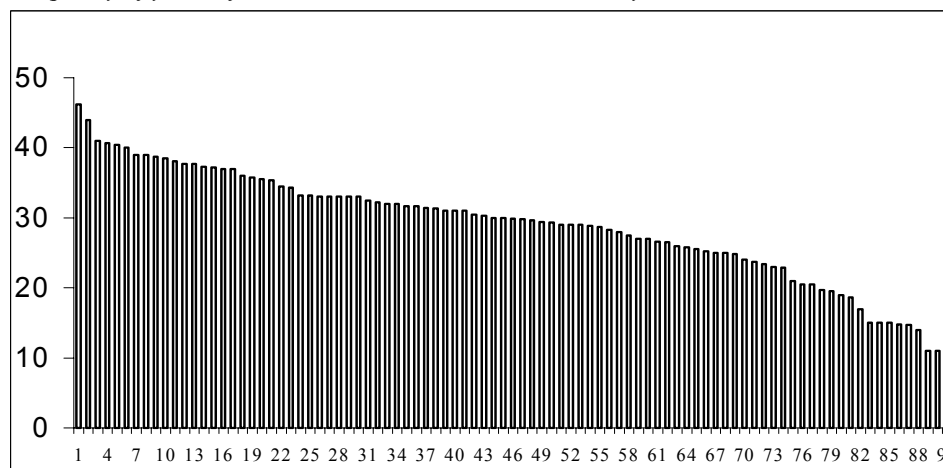

#### What does this mean?

The quality of your referral letters is only a proxy measure for the care you provide. We have chosen to focus on the quality of these because they are accessible and amenable to objective measure. The surgeon may find the information provided by you helpful when allocating an appointment. Failure to mention specific signs or symptoms does not mean that you did not seek or elicit them. Brevity may have caused you not to mention them, at the expense of incomplete information for our consultant colleagues.

#### What do I do well?

(Relevant features of bowel disease addressed in the majority of the GP's referrals were summarised here.)

#### Where could I improve?

(Relevant features of bowel disease not addressed in the majority of the GP's referrals were summarised here.)

#### What next?

We will offer you feedback about your colorectal referrals after the next (number) months. The feedback will be in the same format. You may wish to include this audit in your personal professional development plan. Your local CME tutor will be happy to advise you about the possibility of getting PGEA points. In the meantime if you would like to discuss further or any aspect of this feedback we are happy to arrange this.

Signed by both peer reviewers .....
